# Supplementary material
Source: PubMed Central journal article supplement (PMC5224971)
Supplement: NIHMS831174-supplement-1.pdf [file NIHMS831174-supplement-1.pdf]

Figure S1

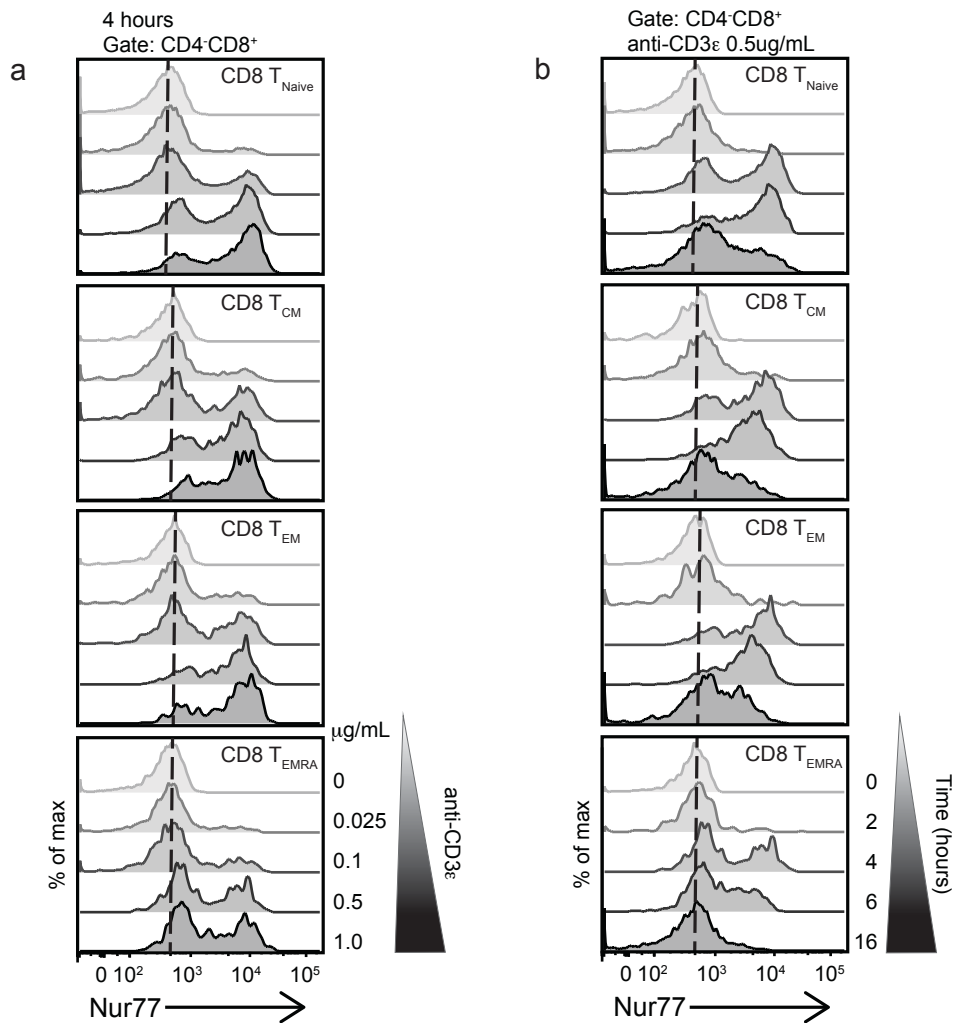

**Figure S1. Dose response and temporal induction of Nur77 in CD8 T cell subsets.**

Histograms represent endogenous intracellular Nur77 in CD8 T cell subsets. **(a)** CD8 RA<sup>+</sup>CCR7<sup>+</sup> naïve (T<sub>Naive</sub>, top panel), RA<sup>-</sup>CCR7<sup>+</sup> central memory (T<sub>CM</sub>, second panel), RA<sup>-</sup>CCR7<sup>-</sup> effector memory (T<sub>EM</sub>, third panel), RA<sup>+</sup>CCR7<sup>-</sup> terminally differentiated memory (T<sub>EMRA</sub>, bottom panel) human T cell subsets from a mixed population of PBMCs were treated with purified anti-CD3ε mAb for 4 h at the indicated doses (ranging from 0.025 – 1.0 μg ml<sup>-1</sup>). **(b)** CD8 RA<sup>+</sup>CCR7<sup>+</sup> naïve (T<sub>Naive</sub>, top panel), RA<sup>-</sup>CCR7<sup>+</sup> central memory (T<sub>CM</sub>, second panel), RA<sup>-</sup>CCR7<sup>-</sup> effector memory (T<sub>EM</sub>, third panel), RA<sup>+</sup>CCR7<sup>-</sup> terminally differentiated memory (T<sub>EMRA</sub>, bottom panel) human T cell subsets from a mixed population of PBMCs were treated with anti-CD3ε 0.5 μg ml<sup>-1</sup> at the indicated time points (ranging from 2 – 16 hours). Data are representative of two biologically different donors.

Figure S2

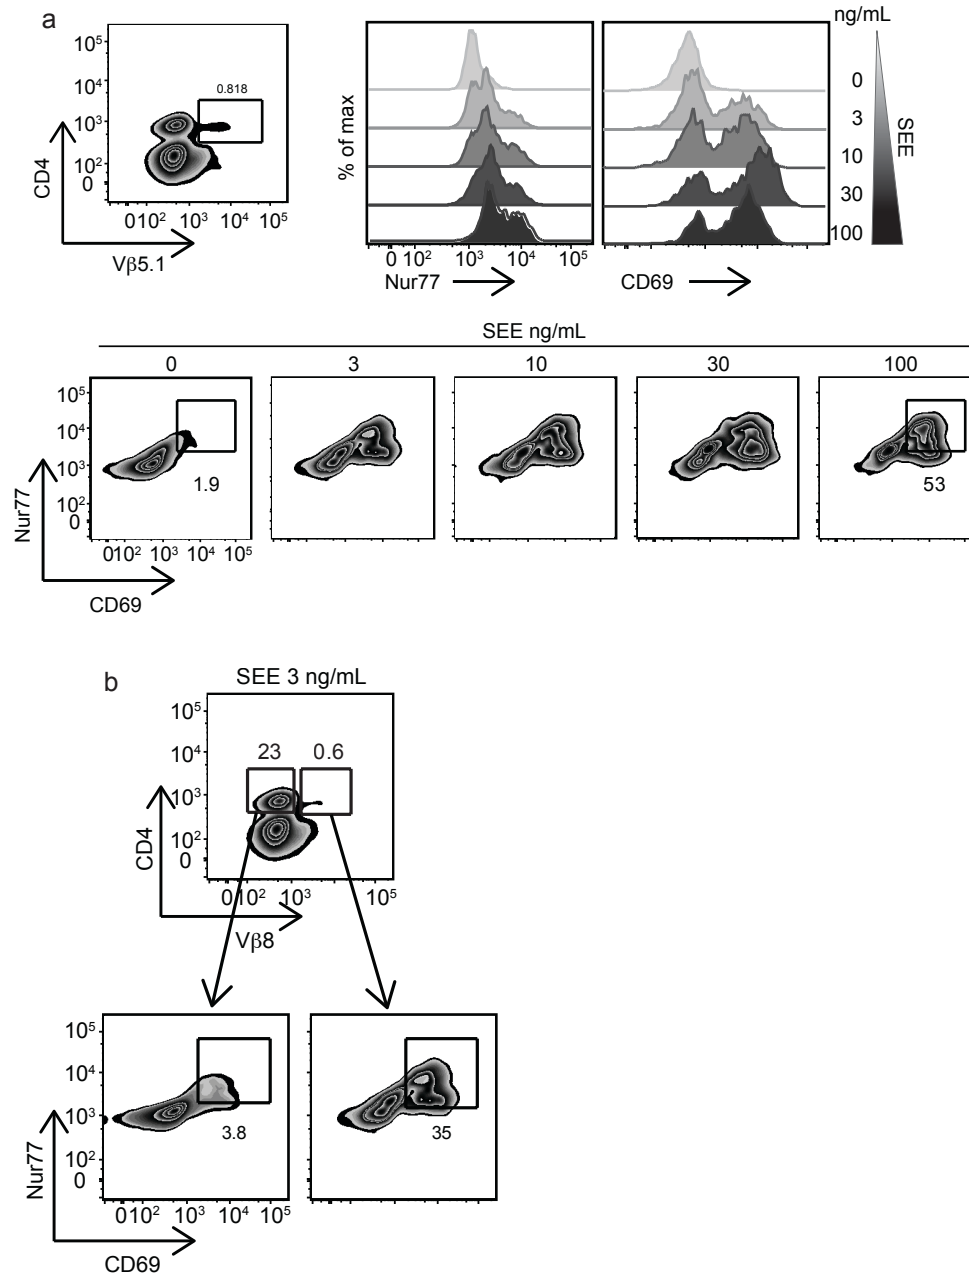

**Figure S2. Stimulation with SEE validates Nur77 as a marker for antigen specific signaling in human T cells.** Mixed human PBMCs were stimulated with soluble SEE for 16 h and analyzed by FACS. **(a)** Upper left, plot demonstrates gating strategy for CD4<sup>+</sup>Vβ8<sup>+</sup> subset. Upper right, histograms representative of intracellular Nur77 and surface CD69 dose responses to SEE 3 – 100 μg ml<sup>-1</sup> as indicated in the CD4<sup>+</sup>Vβ8<sup>+</sup> subset. Bottom row, plots demonstrate Nur77 and CD69 induction in CD4<sup>+</sup>Vβ8<sup>+</sup> subset to SEE at indicated doses. **(b)** Top plot, CD3<sup>+</sup> T cells stained for CD4 and Vβ8 expression to identify double positive and CD4<sup>+</sup>Vβ8<sup>-</sup> subsets. Bottom plots represent Nur77 and CD69 levels in CD4<sup>+</sup>Vβ8<sup>-</sup> (left) or CD4<sup>+</sup>Vβ8<sup>+</sup> (right) subsets stimulated with SEE 3 ng ml<sup>-1</sup> overnight. Data are representative of at least two independent experiments.

Figure S3

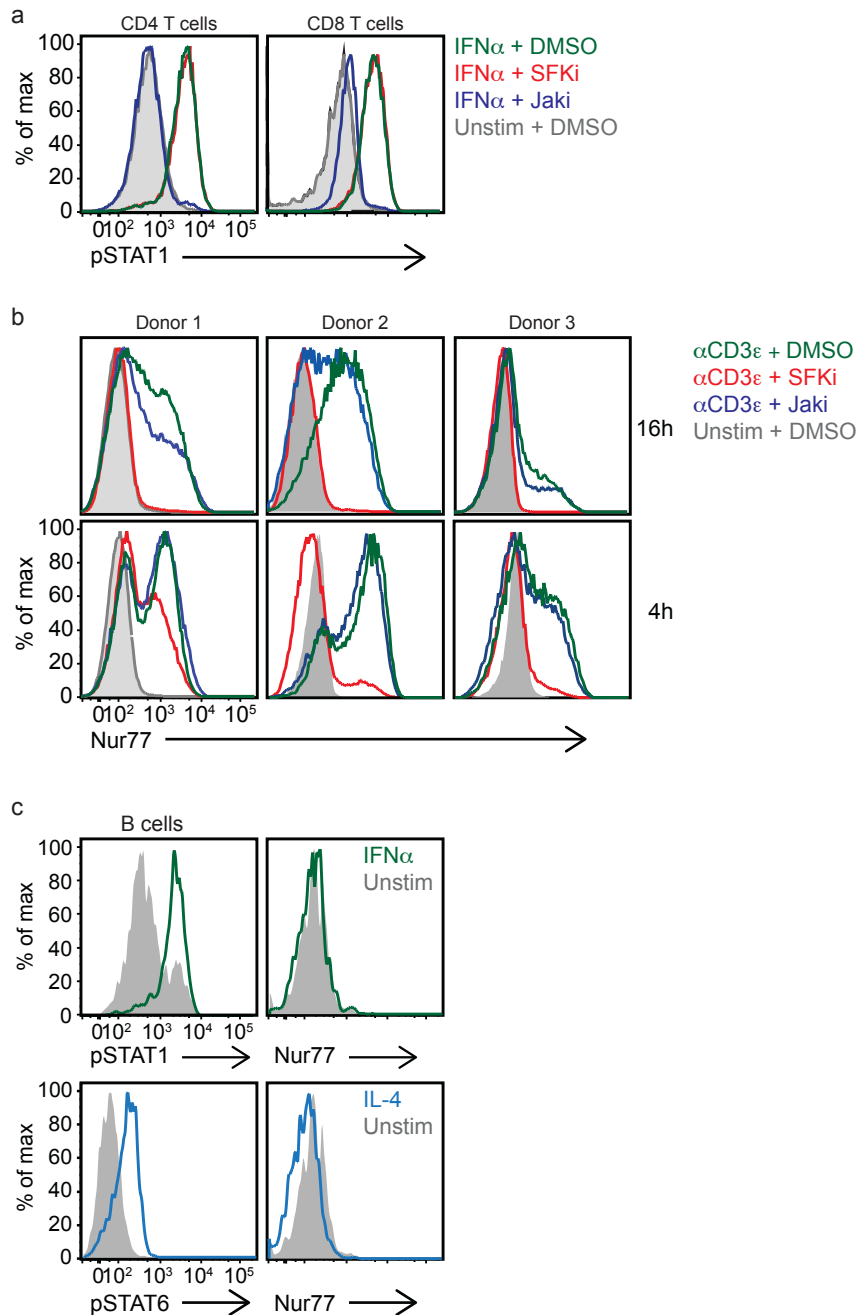

**Figure S3. Nur77 induction is insensitive to Jak-STAT signaling pathways in human T and B cells.**

**(a)** Histograms represent phosphorylation of STAT1 in CD4 (left panel) or CD8 (right panel) T cells from mixed PBMCs that were pre-treated in the presence or absence of specific inhibitors and then stimulated with IFN $\alpha$  10kU mL<sup>-1</sup> for 15 minutes. Filled in grey histograms represent unstimulated samples pretreated with vehicle control (DMSO). **(b)** Histograms represent endogenous Nur77 in CD4 T cells from 3 different donors' mixed PBMCs that were pre-treated in the presence or absence of specific inhibitors and then stimulated for 4 or 16 h with anti-CD3 $\epsilon$  1 $\mu$ g mL<sup>-1</sup>. Filled in grey histograms represent unstimulated samples pretreated with vehicle control (DMSO). **(c)** Histograms represent STAT phosphorylation and Nur77 in B cells after treatment with IFN $\alpha$  10kU mL<sup>-1</sup> or IL-4 10ng mL<sup>-1</sup> for 15 minutes (pSTAT) or 6 hours (Nur77). Filled in grey histograms represent unstimulated samples treated with media alone. Data are representative of three biologically different donors. (SFKi – src family kinase inhibitor, PP2; Jaki – janus kinase inhibitor, tofacitinib).

Figure S4

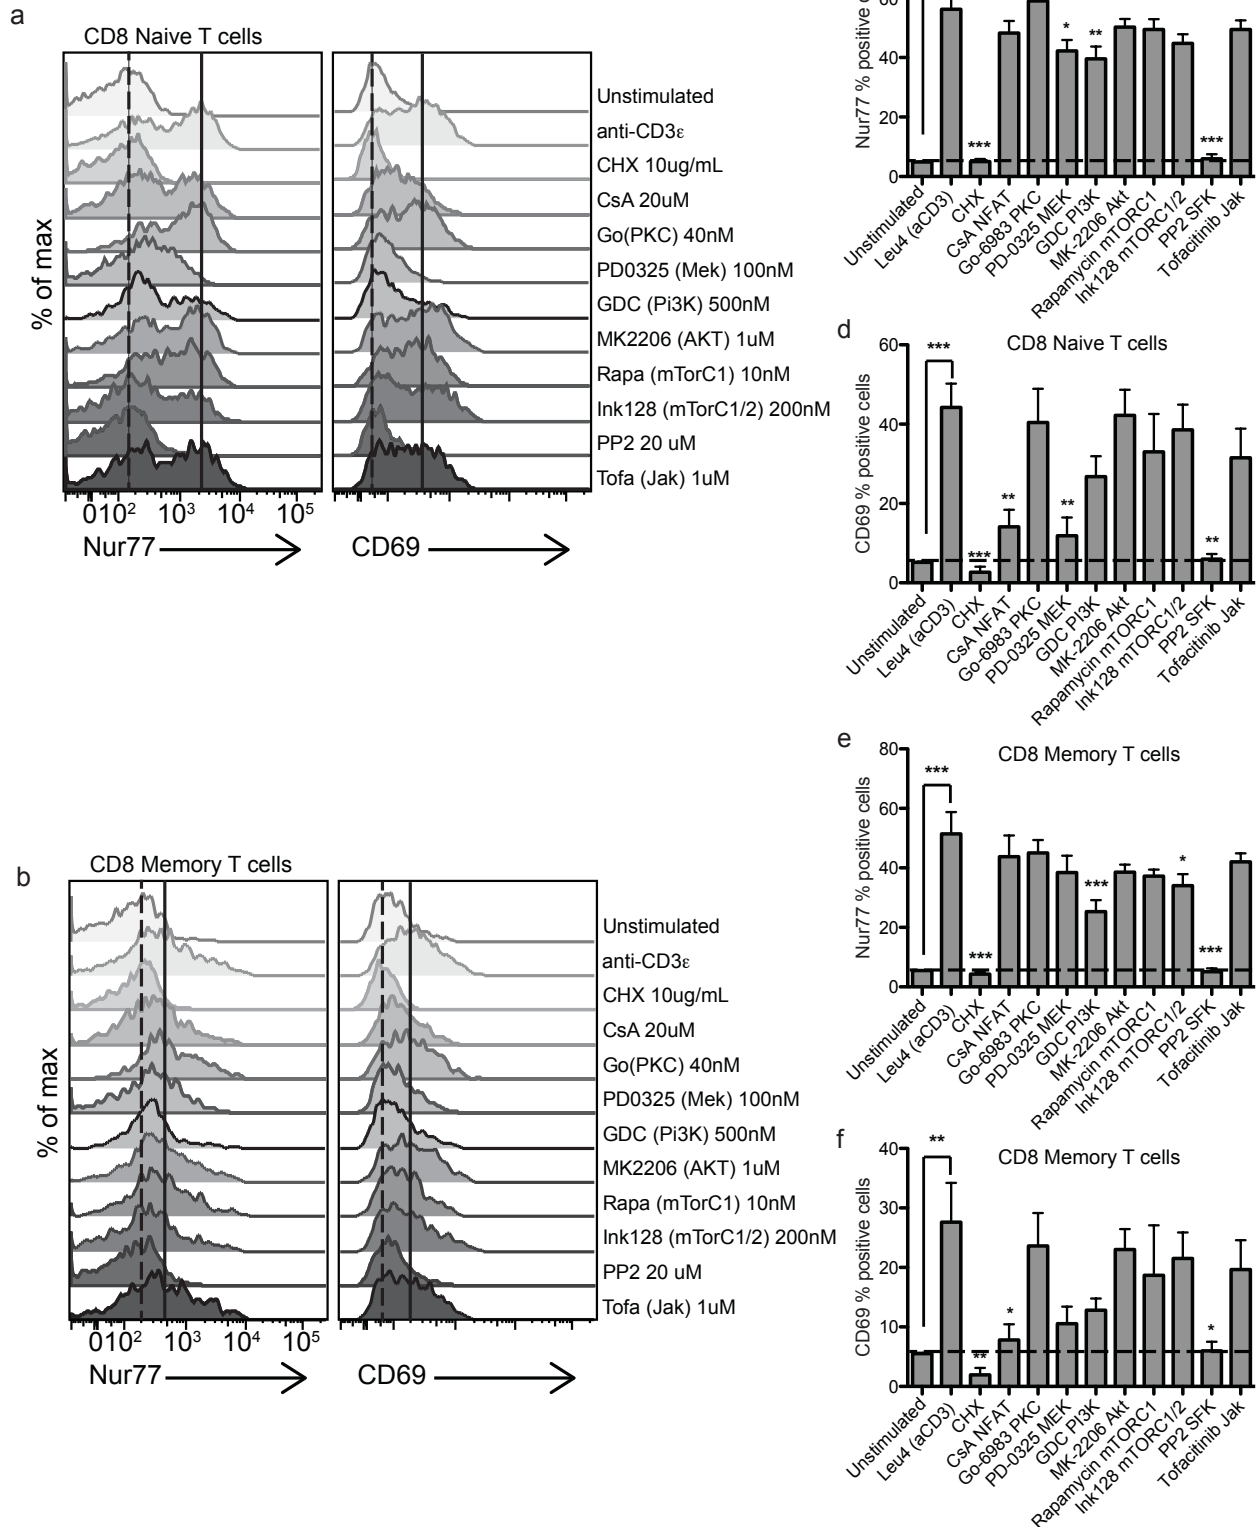

**Figure S4. Nur77 integrates TCR signaling pathways in CD8 naïve and memory T cells.** Histograms represent Nur77 and CD69 induction in CD4<sup>+</sup>CD8<sup>+</sup> naïve (**a**) and memory T cells (**b**) treated with anti-CD3ε in the presence or absence of specific inhibitors for 4 hours. Data in figures S5a-b are representative of at least 5 biologically different donors. (**c-f**) Bar graphs represent Nur77 or CD69 percent positive cells in CD8 naïve (**c,d**) or memory T cells (**e,f**) treated with anti-CD3ε in the presence or absence of specific inhibitors for 4 hours. Horizontal dashed lines in S5c-f mark Nur77 and CD69 percent positive of unstimulated cells. Positive gates were set at the highest 5% of unstimulated cells. Values in S5c-f are the mean of 5-6 biologically different donors +/- SEM. One-way ANOVA was used to compare unstimulated samples (treated with DMSO vehicle control) and inhibitor treatment groups to Leu4 + inhibitor vehicle control (DMSO). \*p<0.05, \*\*p<0.01, \*\*\*p<0.001
